# Supplementary material
Source: PubMed Central journal article supplement (PMC7659368)
Supplement: js0c00307_si_001.pdf [file js0c00307_si_001.pdf]

# USB Powered Coated Blade Spray Ion Source for on-site testing using transportable Mass Spectrometry

Joshua Jager<sup>a</sup>, Arjen Gerssen<sup>a</sup>, Januz Pawliszyn<sup>b</sup>, Saskia S. Sterk<sup>a</sup>, Michel W.F. Nielen<sup>a, c</sup>, Marco H. Blokland<sup>a\*</sup>

<sup>a</sup> Wageningen Food Safety Research (WFSR), part of Wageningen University & Research, P.O. Box 230, 6700 AE Wageningen, The Netherlands.

<sup>b</sup> Department of Chemistry, University of Waterloo, 200 University Avenue West, Waterloo, Ontario N2L3G1, Canada

<sup>c</sup> Wageningen University, Laboratory of Organic Chemistry, Stippeneng 4, 6708 WE Wageningen, The Netherlands.

\* Corresponding author:  
E-mail: marco.blokland@wur.nl

## Supporting information

### Table of contents

**Table S1:** Instrument settings for cone voltage, collision energy, and adapted MS/MS ions of sulfonamide antibiotics and their corresponding internal standard.

**Figure S1.** Oscilloscopic derived electric potential build-up curve. (a) The associated build-up curve of the created USB-HV device. (b) The oscilloscopic determined build-up curve of MS-source HV.

**Figure S2.** Full scan mass spectrum showing the precursor ions ( $m/z$ ) of 22  $\beta$ -agonists.

**Figure S3.** MRM chronograms of the most intense fragment of 13 sulfonamide antibiotics in bovine milk.

**Table S1:** Instrument settings for cone voltage, collision energy, and adapted MS/MS ions of sulfonamide antibiotics and their corresponding internal standard.

| Component                                            | Corresponding internal standard                      | Precursor ion mass ( $m/z$ ) | Product ion mass ( $m/z$ ) | Cone voltage (V) | Coll. Energy (eV) |
|------------------------------------------------------|------------------------------------------------------|------------------------------|----------------------------|------------------|-------------------|
| Sulfacetamide                                        |                                                      | 215.2                        | 156.1                      | 35               | 15                |
|                                                      |                                                      |                              | 92.2                       | 35               | 18                |
| Sulfadiazine                                         | Sulfadiazine-d <sub>4</sub>                          | 251.2                        | 156.1                      | 24               | 15                |
|                                                      |                                                      |                              | 92.2                       | 24               | 25                |
| Sulfadiazine-d <sub>4</sub>                          |                                                      | 255.2                        | 96.2                       | 24               | 25                |
| Sulfathiazole                                        | Sulfathiazole- <sup>13</sup> C <sub>6</sub>          | 256.2                        | 156.1                      | 26               | 15                |
|                                                      |                                                      |                              | 92.2                       | 26               | 25                |
| Sulfathiazole- <sup>13</sup> C <sub>6</sub>          |                                                      | 262.2                        | 162.1                      | 26               | 15                |
| Sulfapyridine                                        | Sulfapyridine- <sup>13</sup> C <sub>6</sub>          | 250.2                        | 156.1                      | 26               | 30                |
|                                                      |                                                      |                              | 92.2                       | 26               | 15                |
| Sulfapyridine- <sup>13</sup> C <sub>6</sub>          |                                                      | 256.2                        | 98.2                       | 26               | 30                |
| Sulfamerazine                                        | Sulfamerazine- <sup>13</sup> C <sub>6</sub>          | 265.2                        | 156.1                      | 28               | 30                |
|                                                      |                                                      |                              | 92.2                       | 28               | 15                |
| Sulfamerazine- <sup>13</sup> C <sub>6</sub>          |                                                      | 271.2                        | 98.2                       | 28               | 30                |
| Sulfamoxole                                          |                                                      | 268.2                        | 156.1                      | 23               | 15                |
|                                                      |                                                      |                              | 92.2                       | 23               | 25                |
| Sulfadimidine                                        | Sulfadimidine- <sup>13</sup> C <sub>6</sub>          | 279.2                        | 186.2                      | 28               | 15                |
|                                                      |                                                      |                              | 92.2                       | 28               | 30                |
| Sulfadimidine- <sup>13</sup> C <sub>6</sub>          |                                                      | 285.2                        | 186.2                      | 28               | 15                |
| Sulfamethizole                                       | Sulfamethizole- <sup>13</sup> C <sub>6</sub>         | 271.1                        | 156.1                      | 24               | 15                |
|                                                      |                                                      |                              | 92.2                       | 24               | 30                |
| Sulfamethizole- <sup>13</sup> C <sub>6</sub>         |                                                      | 277.1                        | 162.1                      | 24               | 15                |
| Sulfamethoxypyridazine                               | Sulfamethoxypyridazine- <sup>13</sup> C <sub>6</sub> | 281.2                        | 156.1                      | 25               | 15                |
|                                                      |                                                      |                              | 92.2                       | 25               | 30                |
| Sulfamethoxypyridazine- <sup>13</sup> C <sub>6</sub> |                                                      | 284.2                        | 156.1                      | 25               | 15                |
| Sulfachloropyridazine                                | Sulfachloropyridazine- <sup>13</sup> C <sub>6</sub>  | 285.2                        | 156.1                      | 23               | 15                |
|                                                      |                                                      |                              | 92.2                       | 23               | 30                |
| Sulfachloropyridazine- <sup>13</sup> C <sub>6</sub>  |                                                      | 291.2                        | 162.1                      | 23               | 15                |
| Sulfamonomethoxine                                   |                                                      | 281.2                        | 156.1                      | 30               | 20                |
|                                                      |                                                      |                              | 92.2                       | 30               | 30                |
| Sulfamethoxazole                                     | Sulfamethoxazole-d <sub>4</sub>                      | 254.2                        | 156.1                      | 22               | 15                |
|                                                      |                                                      |                              | 92.2                       | 22               | 25                |
| Sulfamethoxazole-d <sub>4</sub>                      |                                                      | 258.2                        | 96.2                       | 22               | 25                |

|                                                |                                                |       |       |    |    |
|------------------------------------------------|------------------------------------------------|-------|-------|----|----|
| Sulfadoxine                                    | Sulfadoxine-d <sub>3</sub>                     | 311.2 | 156.1 | 24 | 20 |
|                                                |                                                |       | 92.2  | 24 | 30 |
| Sulfadoxine-d <sub>3</sub>                     |                                                | 314.2 | 159.1 | 24 | 20 |
| Sulfisoxazole                                  | Sulfisoxazole- <sup>13</sup> C <sub>6</sub>    | 268.2 | 156.1 | 21 | 15 |
|                                                |                                                |       | 92.2  | 21 | 30 |
| Sulfisoxazole- <sup>13</sup> C <sub>6</sub>    |                                                | 274.2 | 162.2 | 21 | 15 |
| Sulfaphenazole                                 |                                                | 315.2 | 156.1 | 35 | 19 |
|                                                |                                                |       | 92.2  | 35 | 26 |
| Sulfadimethoxine                               | Sulfadimethoxine-d <sub>4</sub>                | 311.2 | 156.1 | 28 | 20 |
|                                                |                                                |       | 92.2  | 28 | 35 |
| Sulfadimethoxine-d <sub>4</sub>                |                                                | 317.2 | 156.1 | 28 | 20 |
| Sulfaquinoxaline                               | Sulfaquinoxaline- <sup>13</sup> C <sub>6</sub> | 301.2 | 156.1 | 30 | 15 |
|                                                |                                                |       | 92.2  | 30 | 30 |
| Sulfaquinoxaline- <sup>13</sup> C <sub>6</sub> |                                                | 307.2 | 162.1 | 30 | 15 |

---

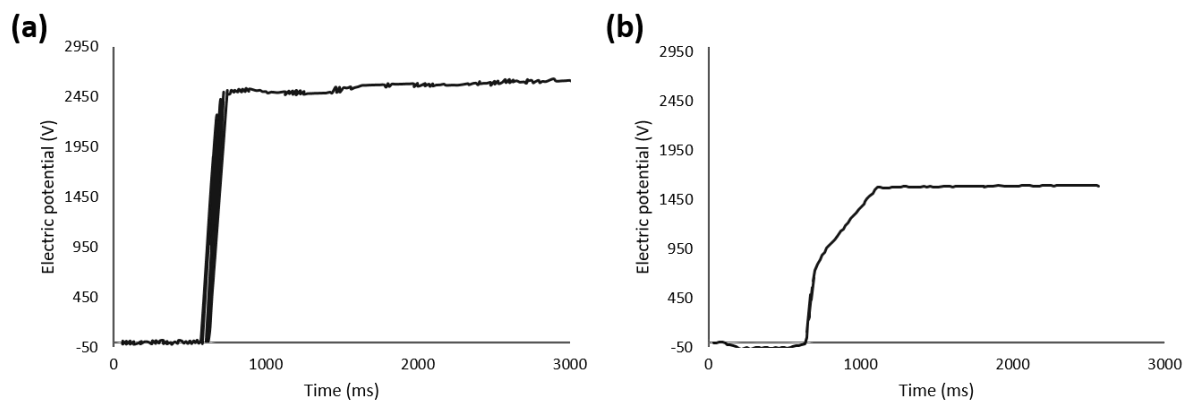

**Figure S1.** Oscilloscopic derived electric potential build-up curve. (a) The associated build-up curve of the created USB-HV device. (b) The oscilloscopic determined build-up curve of MS-source HV.

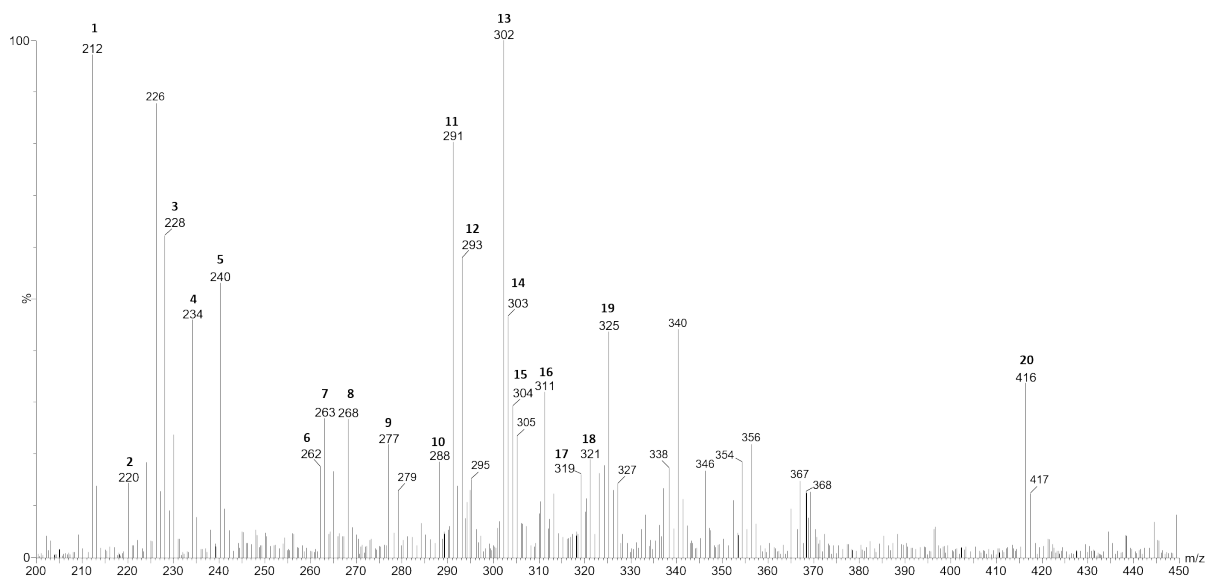

**Figure S2.** Full scan mass spectrum showing the precursor ions ( $m/z$ ) of 22  $\beta$ -agonists at different concentrations (1) 2000  $\mu\text{g/L}$  of metaproterenol, (2) 100  $\mu\text{g/L}$  cimaterol, (3) 40  $\mu\text{g/L}$  tulobuterol, (4) 100  $\mu\text{g/L}$  cimbuterol, (5) 200  $\mu\text{g/L}$  salbutamol, (6) 200  $\mu\text{g/L}$  zilpaterol, (7) 100  $\mu\text{g/L}$  clenproperol, (8) 200  $\mu\text{g/L}$  carbuterol, (9) 40  $\mu\text{g/L}$  clenbuterol, (10) 100  $\mu\text{g/L}$  ritodrine, (11) 100  $\mu\text{g/L}$  clenpenterol and 200  $\mu\text{g/L}$  procatamol, (12) 40  $\mu\text{g/L}$  hydroxymethylclenbuterol, (13) 100  $\mu\text{g/L}$  isoxsurpine and 200  $\mu\text{g/L}$  ractopamine, (14) 200  $\mu\text{g/L}$  clenhexyl, (15) 200  $\mu\text{g/L}$  fenoterol, (16) 40  $\mu\text{g/L}$  mabuterol, (17) 200  $\mu\text{g/L}$  clenclorhexerol, (18) 40  $\mu\text{g/L}$  chlorbrombuterol, (19) 40  $\mu\text{g/L}$  mapenterol, and (20) 200  $\mu\text{g/L}$  salmeterol.

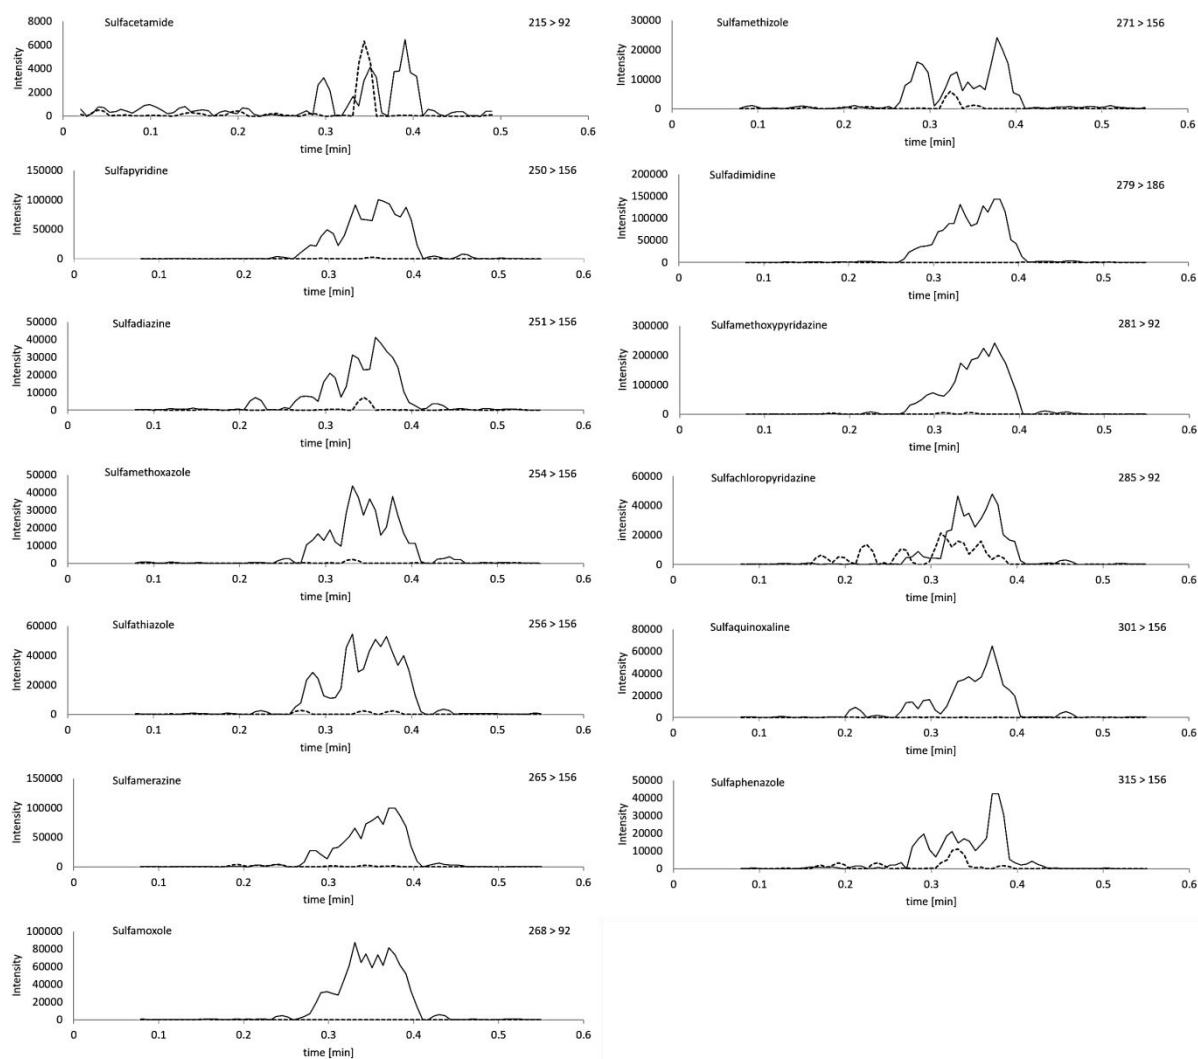

**Figure S3.** MRM chromatograms of the most intense fragment of 13 sulfonamide antibiotics in bovine milk. The solid lines represent chromatograms of bovine milk spiked at MRL (100  $\mu\text{g}/\text{kg}$ ) and the dotted lines represent chromatograms of blank bovine milk.
